# Supplementary material
Source: PubMed Central journal article supplement (PMC4073782)
Supplement: NIHMS589789-supplement-Supplementary_information.pdf [file NIHMS589789-supplement-Supplementary_information.pdf]

Supplementary Figure 1. Known biodegradation pathway of four xenobiotic compounds. A, 4-chlorobiphenyl (CBP); B, phenanthrene (PHE); C,  $\gamma$ -hexachlorocyclohexane (GHCH); D, 1,2,4-trichlorobenzene (1,2,4-TCB).

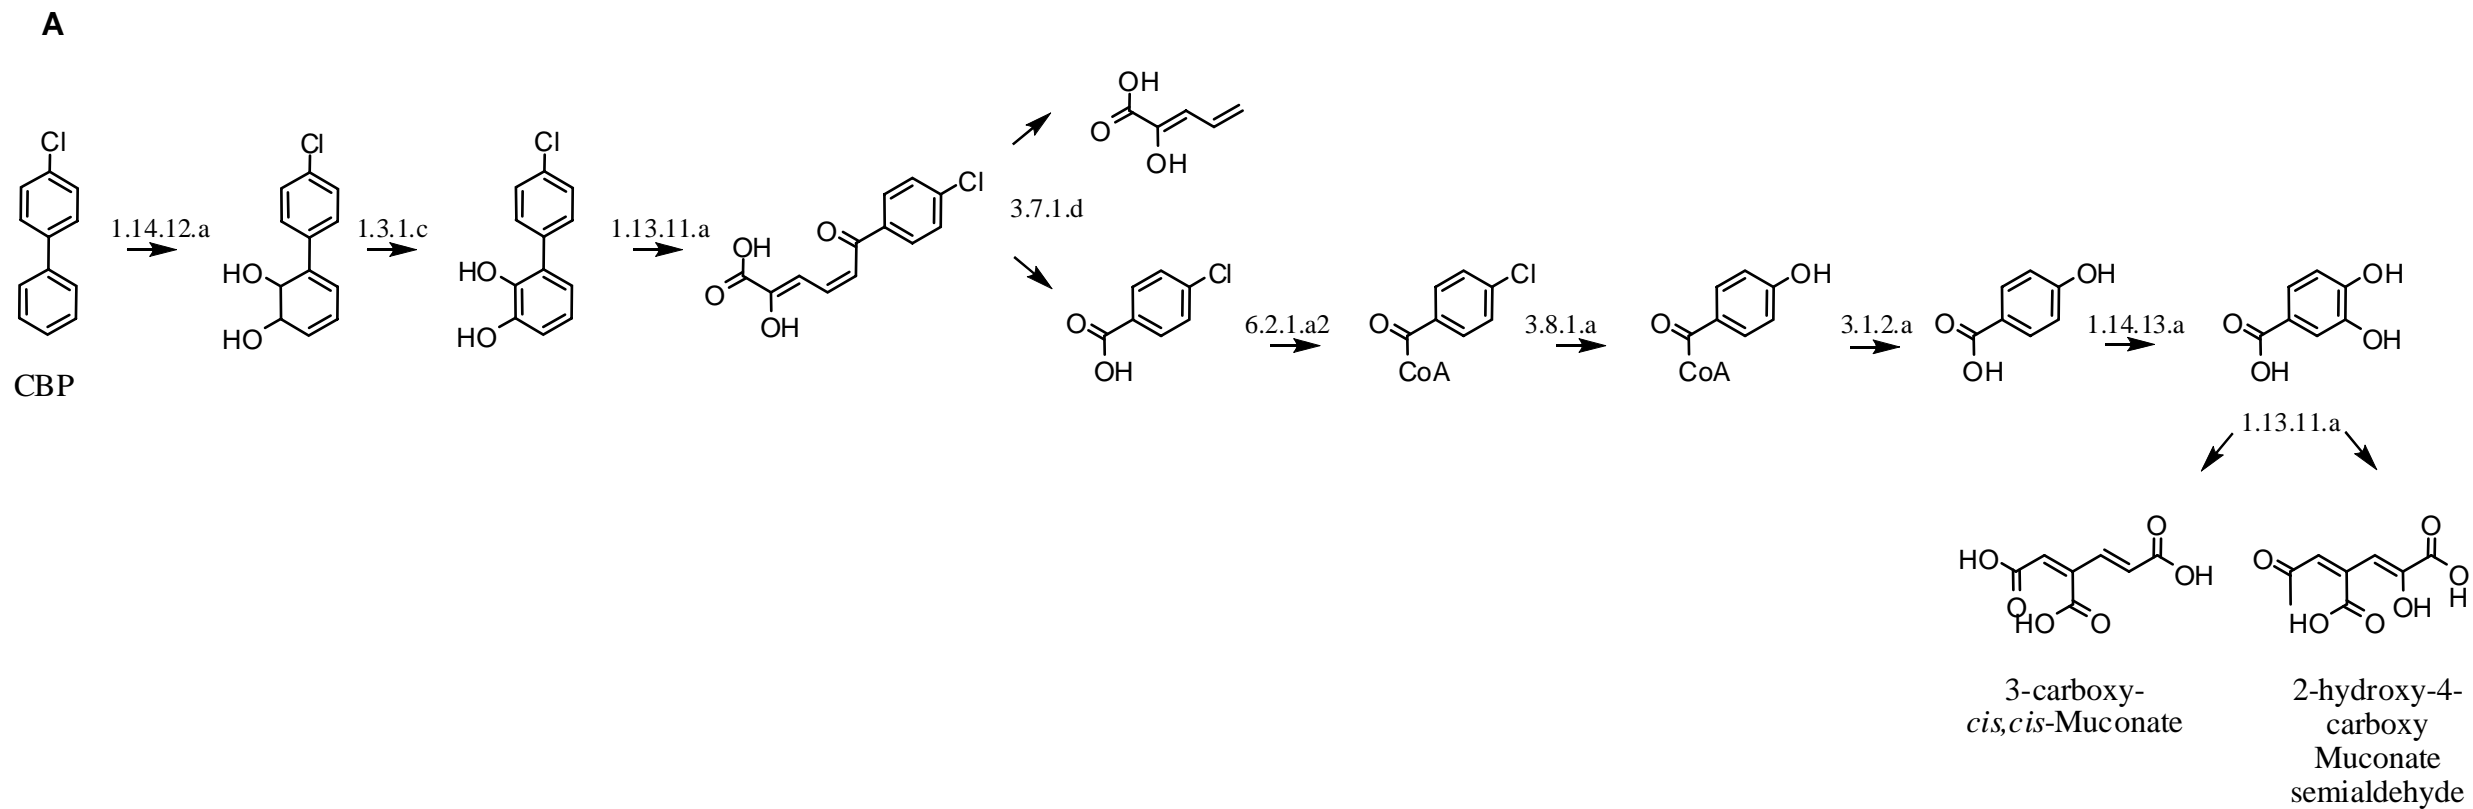

**B**

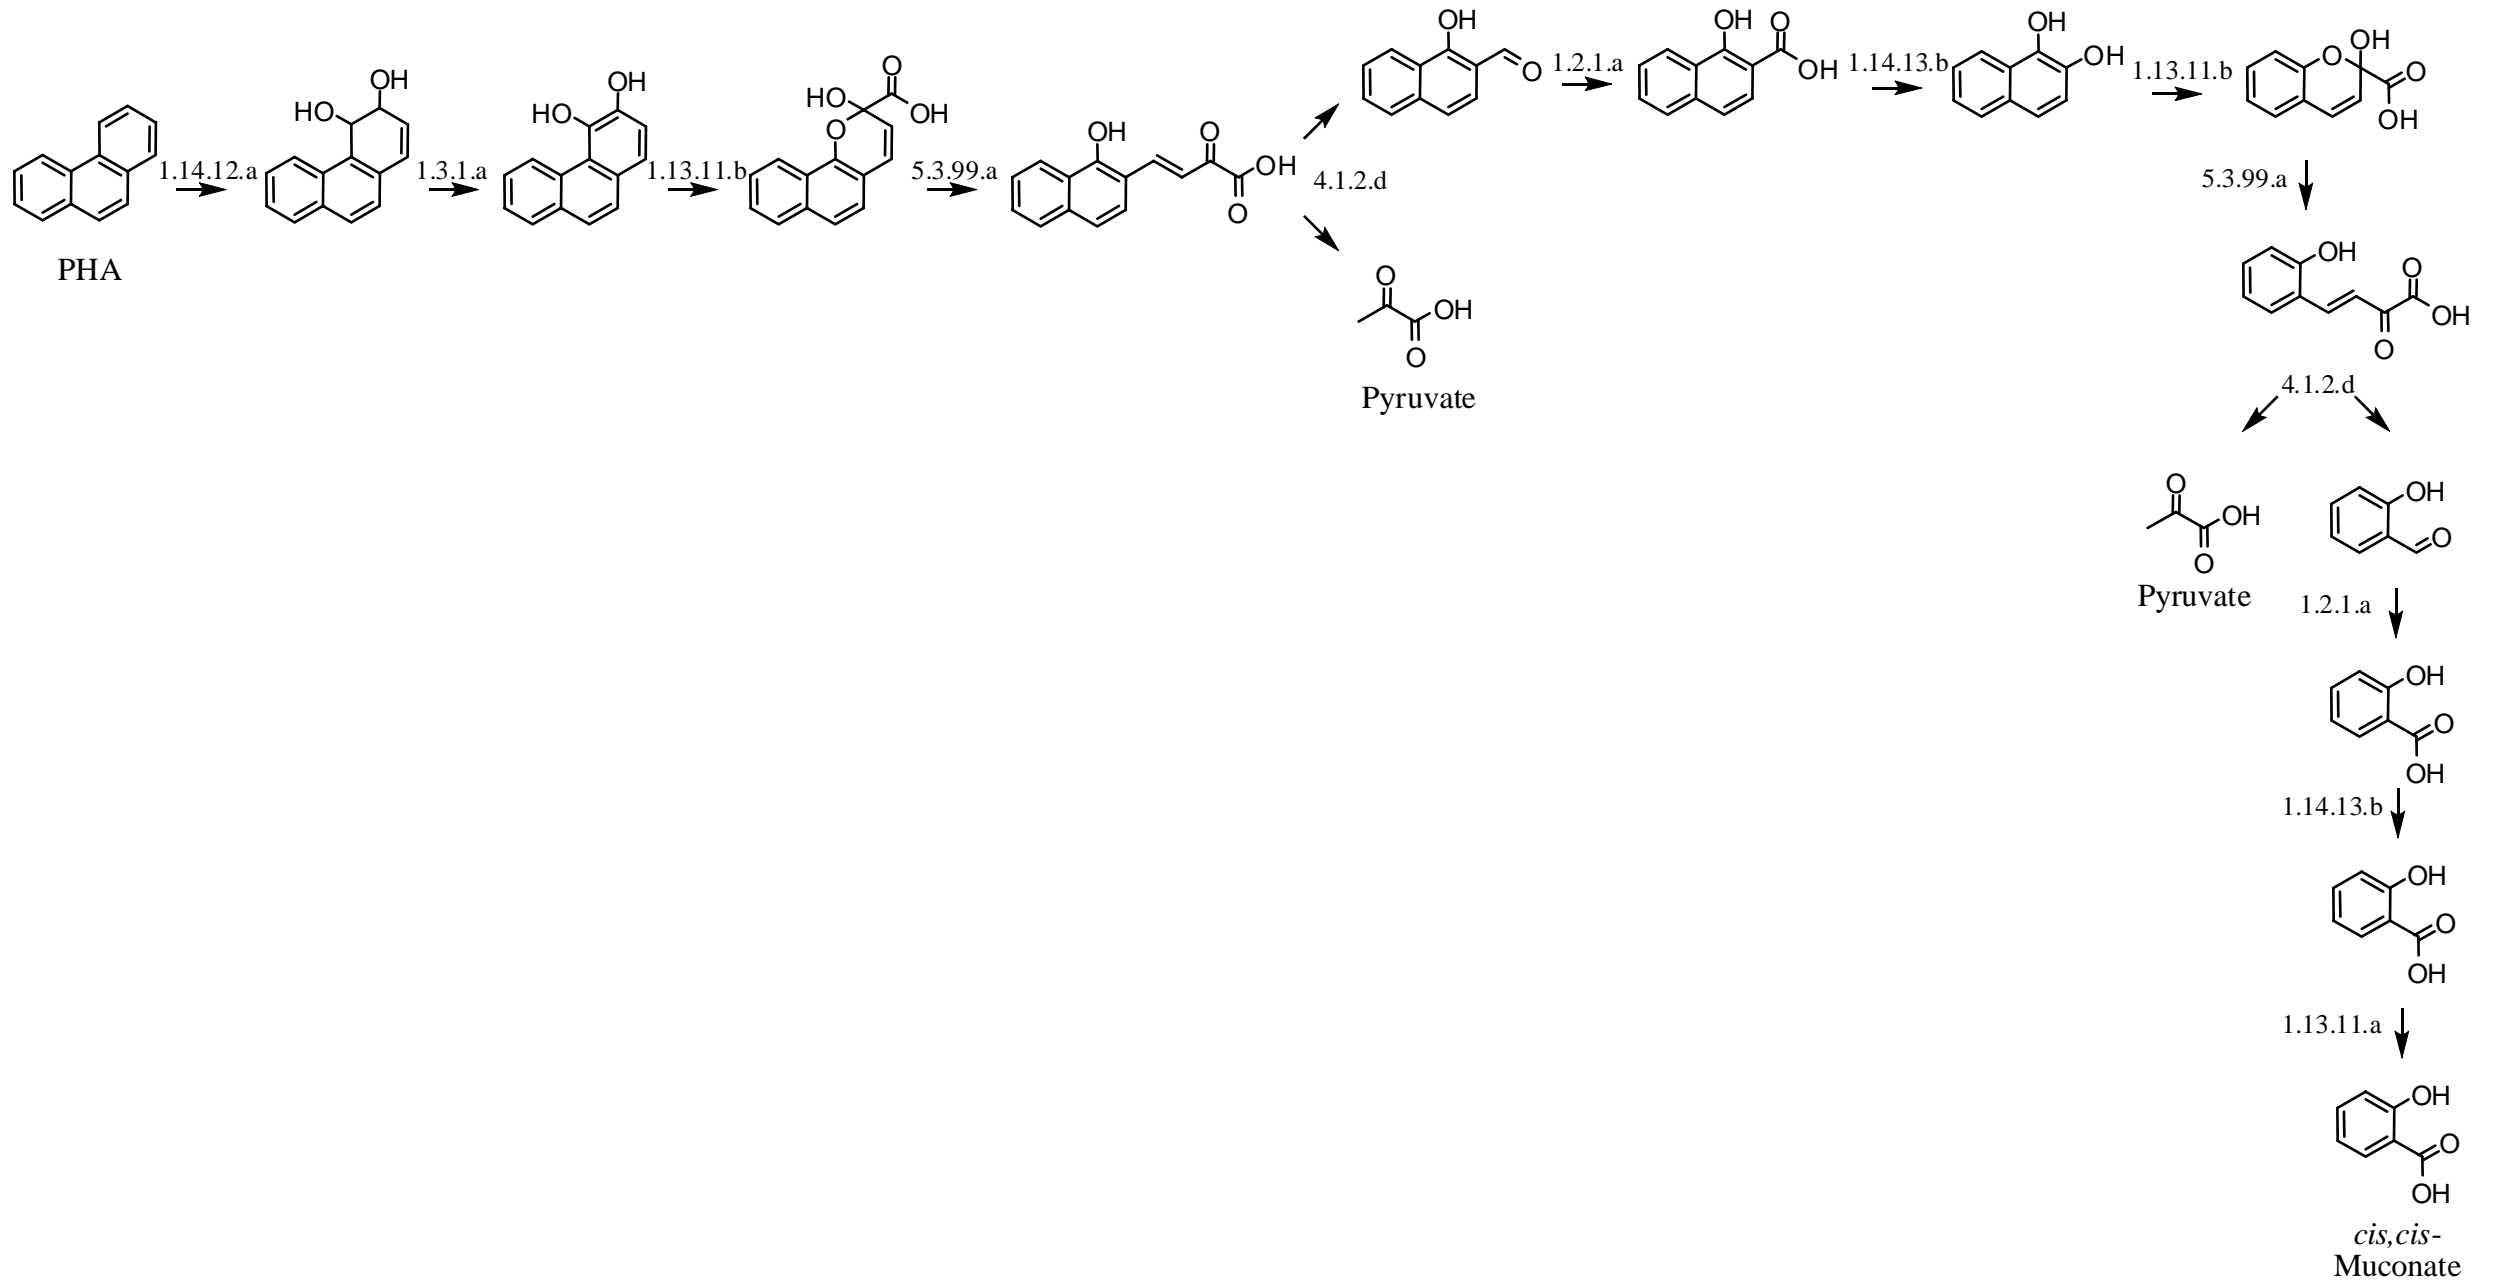

**c**

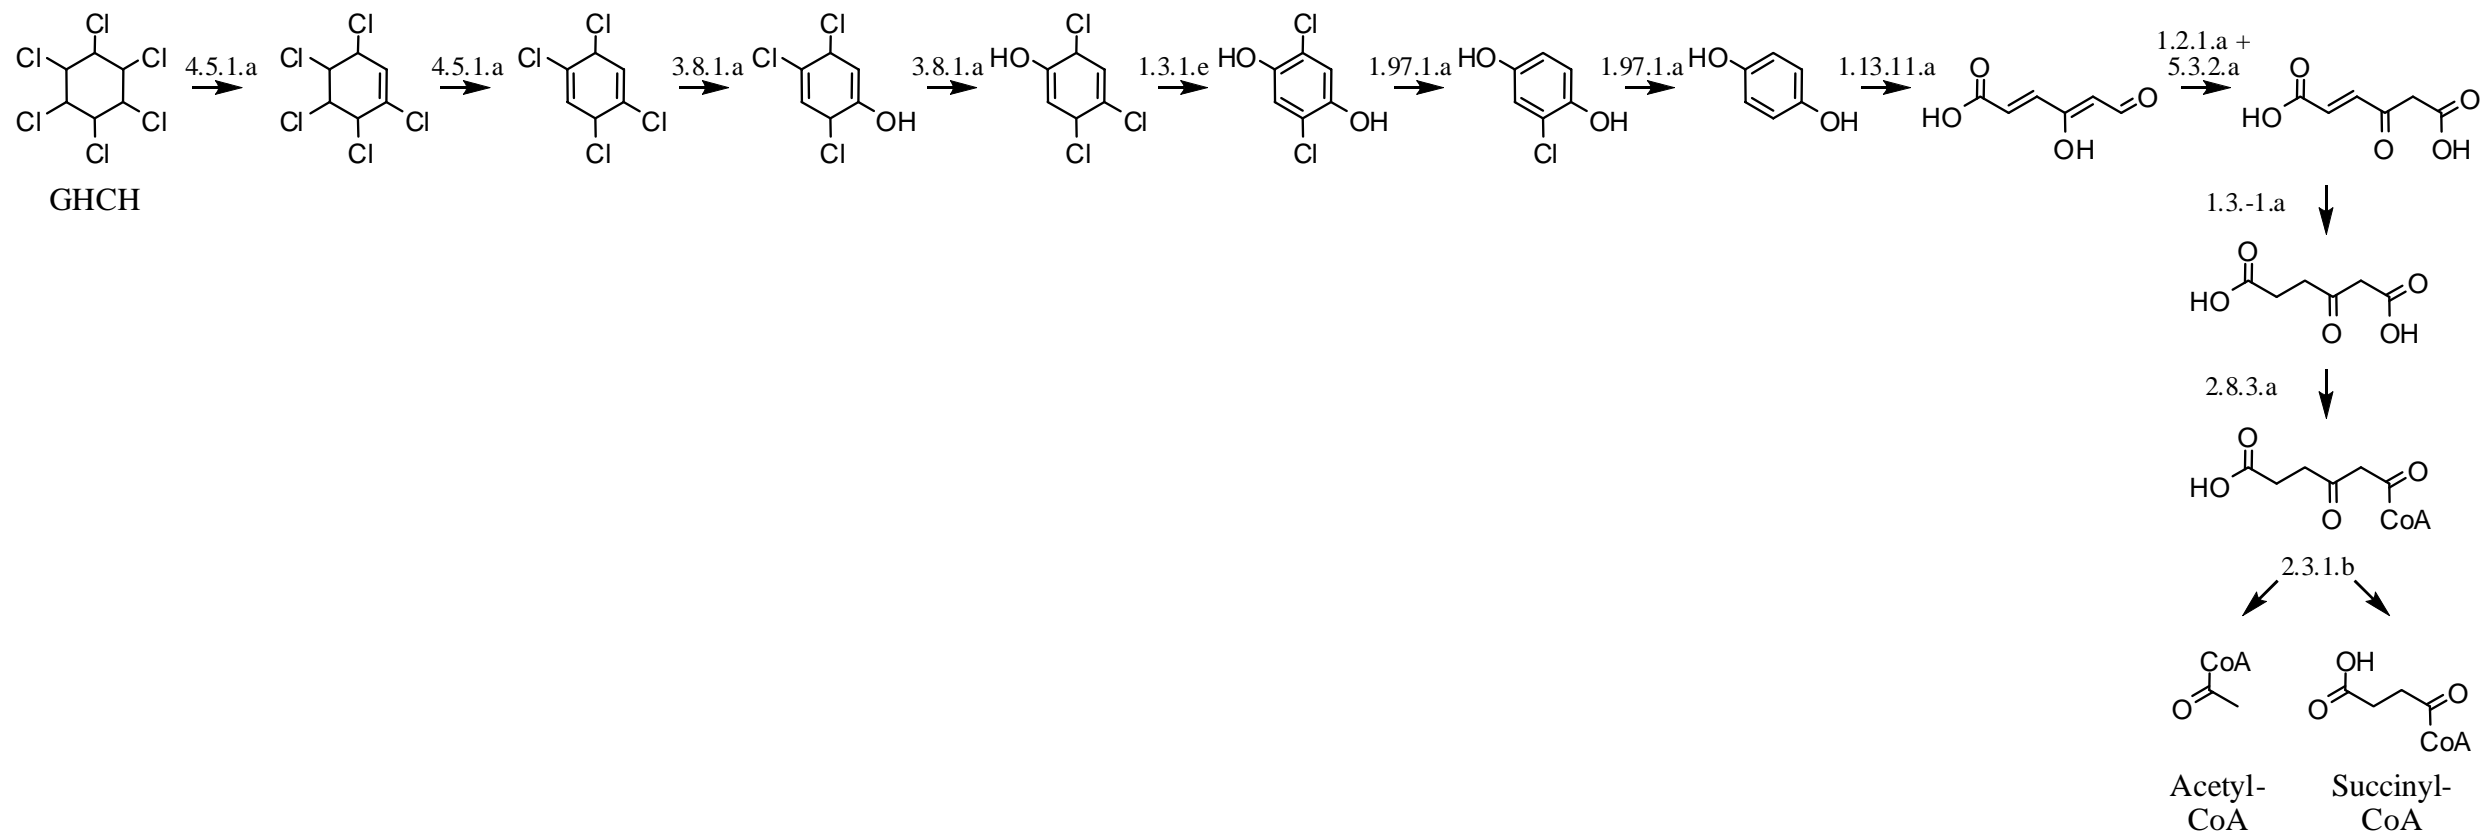

D

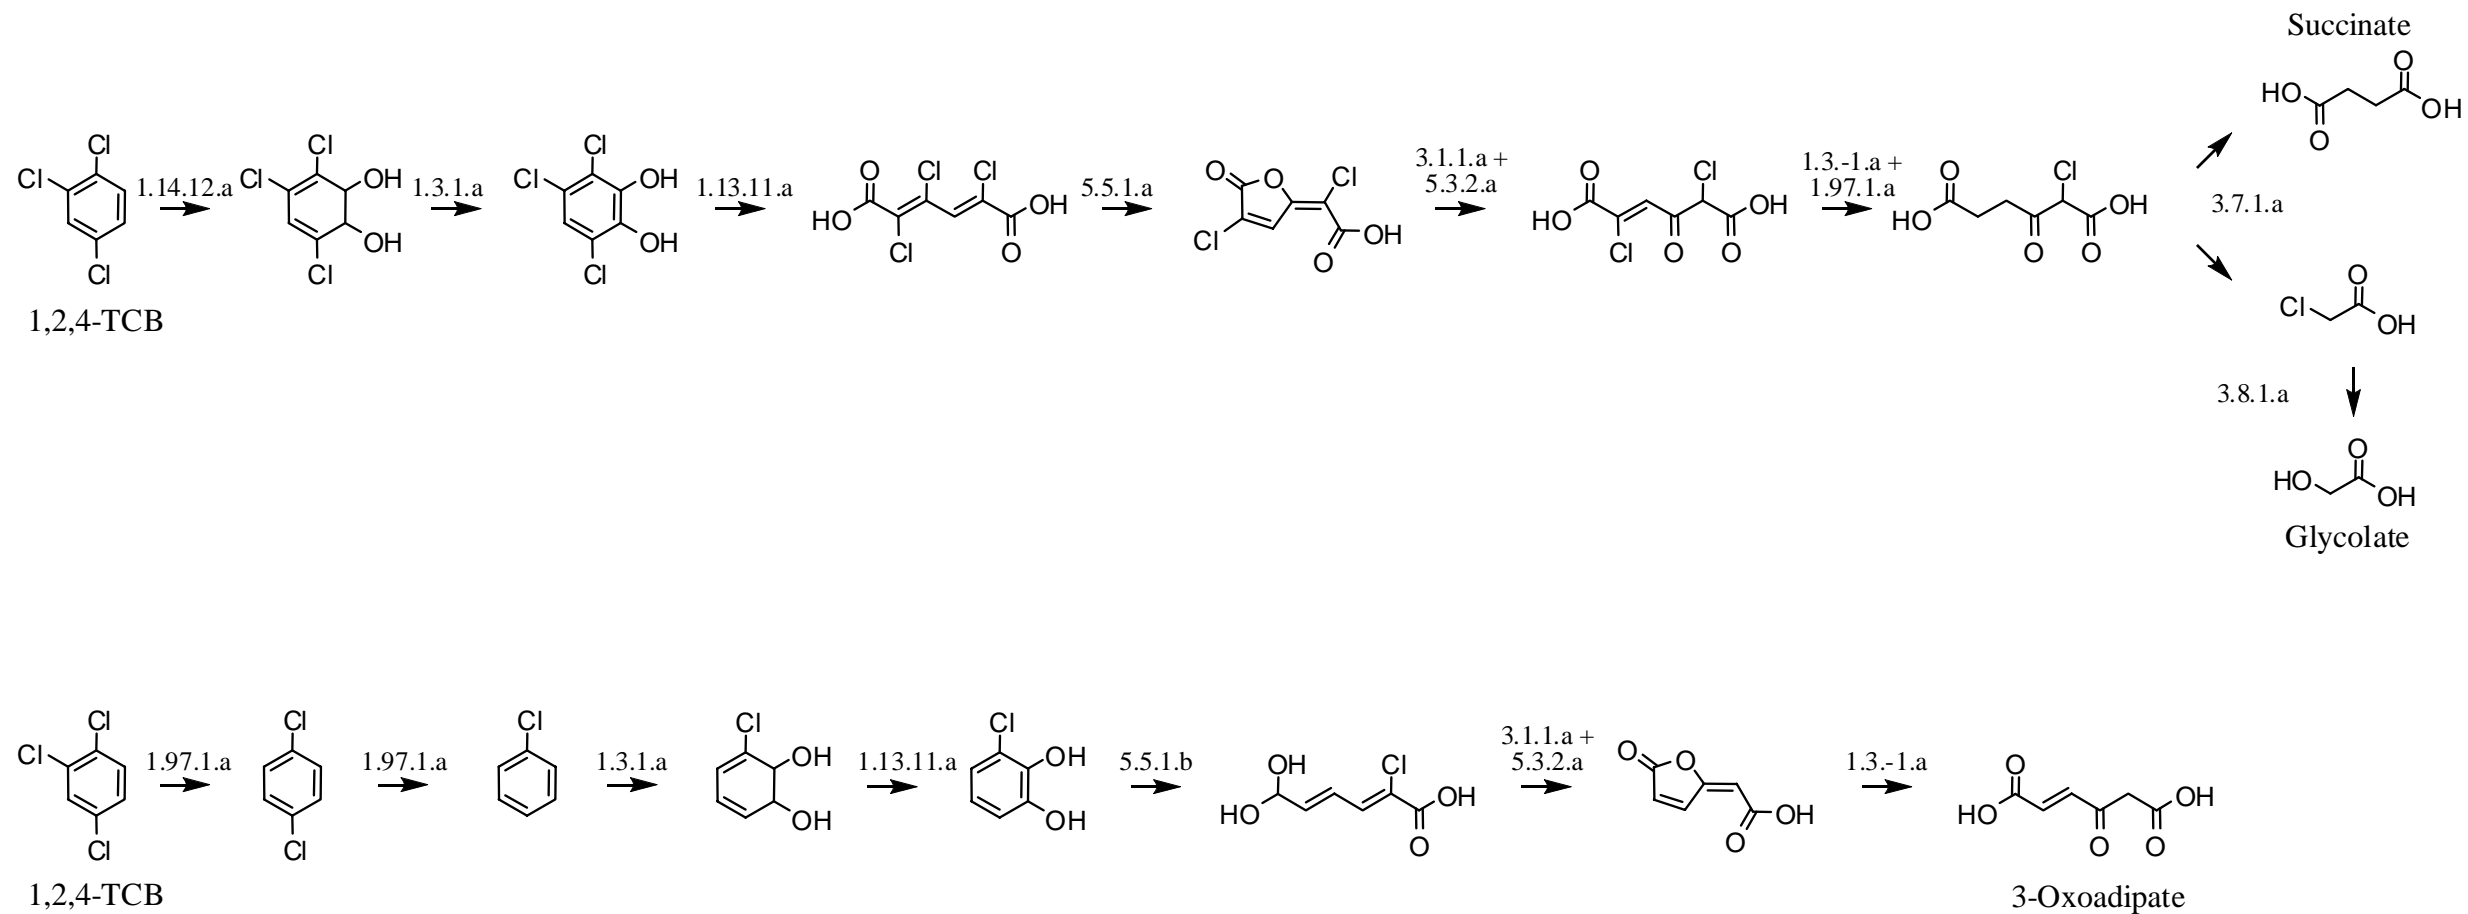

**Supplementary Table I. Description of reaction operators.**

**Operator    Operator action**

**1.2.1: Oxidoreductases acting on the aldehyde or oxo group of donors**

1.2.1.a

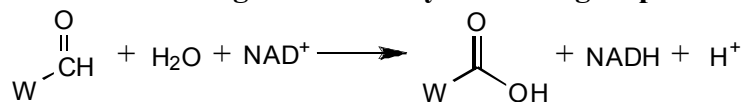

W must be carbon or hydrogen.

**1.3.1: Oxidoreductases acting on the CH-CH group of donors**

1.3.1.a

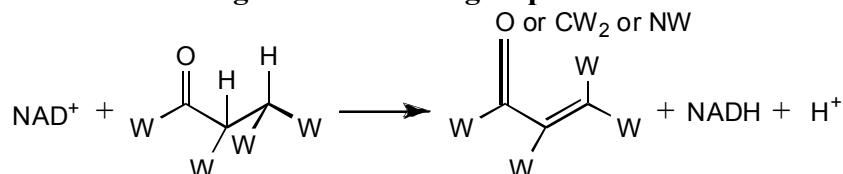

All W's can be any type of atom.

1.3.-1.a

Exact reverse of 1.3.1.a

1.3.1.c

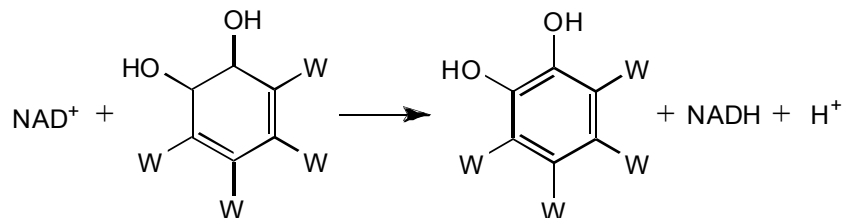

All W's can be any type of atom.

1.3.1.e

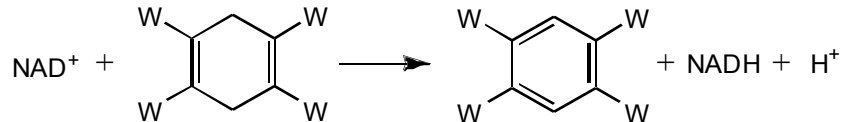

W must be OH, Br, Cl, F, or I.

**1.13.11: Acting on single donors with O<sub>2</sub> as oxidant and incorporation of two atoms of oxygen**

1.13.11.a

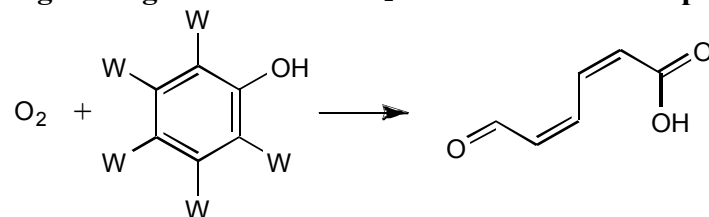

W can be any type of atom.

1.13.11.b

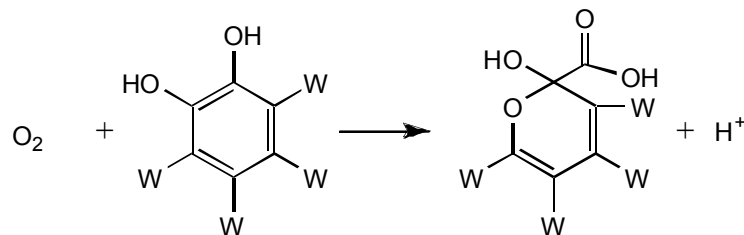

All W's can be any type of atom.

---

**1.14.12: Dioxygenases with NADH or NADPH as one donor**

1.14.12.a

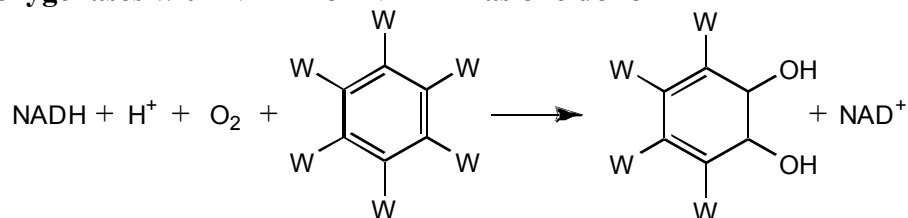

All W's can be any type of atom.

---

**1.14.12: Monooxygenases with NADH or NADPH as one donor**1.14.13.a  $\text{NADH} + \text{H}^+ + \text{O}_2 + \text{C}-\text{H} \longrightarrow \text{C}-\text{OH} + \text{NAD}^+ + \text{H}_2\text{O}$ 

1.14.13.b

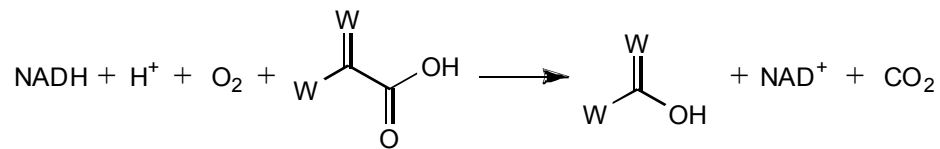

All W's can be any type of atom.

---

**1.97.1: Oxidoreductases**

1.97.1.a

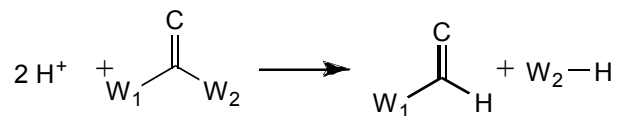 $\text{W}_1 = \text{C}, \text{H}, \text{ or halogen}; \text{W}_2 = \text{halogen}$ 

---

**2.3.1: Transferring groups other than amino-acyl groups**

2.3.1.b

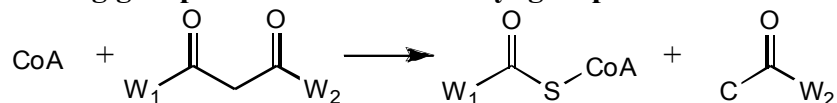 $\text{W}_1$  must be carbon;  $\text{W}_2 = \text{C}$  or  $\text{S}$ .

---

**2.8.3: CoA-transferases**

2.8.3.a

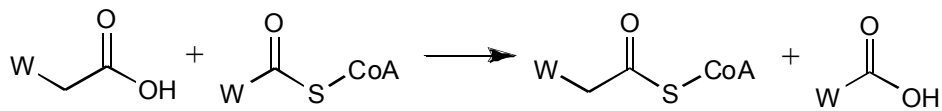

W must be carbon.

---

**3.1.1: Carboxylic ester hydrolases**

3.1.1.a

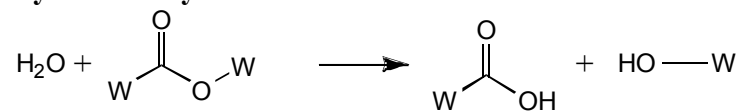

W must be carbon.

---

### 3.1.2: Thiolester hydrolases

3.1.2.a

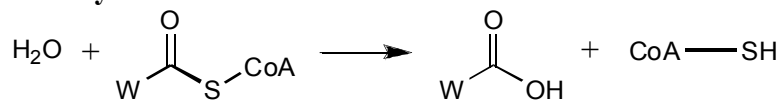

W can be any type of atom.

---

### 3.7.1: Acting on carbon-carbon bonds in ketonic substances

3.7.1.d

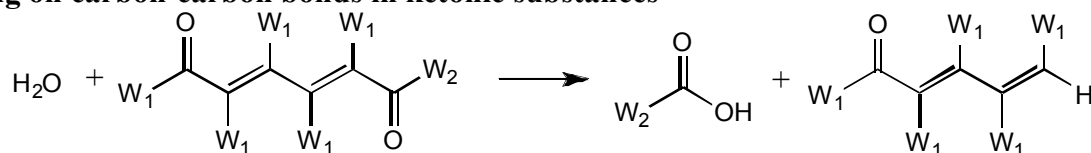

W<sub>1</sub> can be anything. W<sub>2</sub> cannot be oxygen.

3.7.1.e

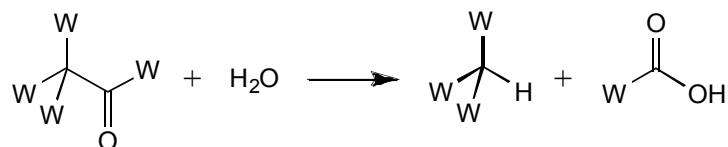

W must be carbon or nitrogen

---

### 3.8.1: Carbon-halide hydrolases

3.8.1.a

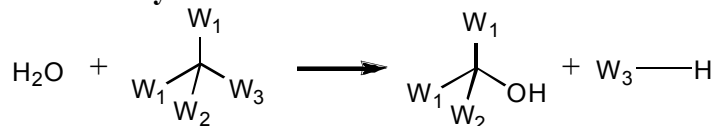

W<sub>1</sub> must be carbon. W<sub>2</sub> = C, H, or N. W<sub>3</sub> = halogen.

---

### 4.2.1: Carbon-oxygen hydrolyases

4.2.1.j

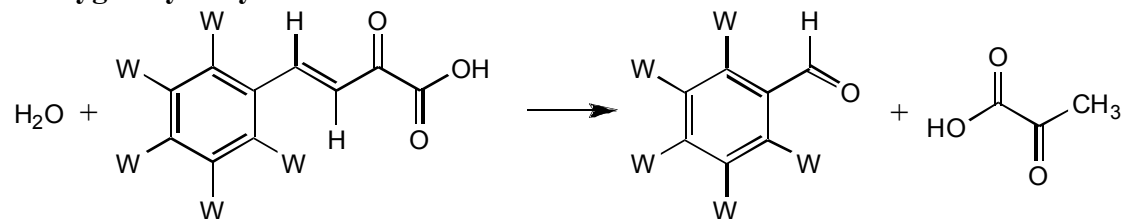

All W's can be any type of atom.

---

### 4.5.1: Carbon-halide lyases

4.5.1.a

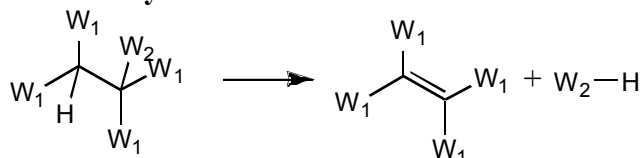

W<sub>1</sub> = C or halogen. W<sub>2</sub> must be a halogen.

---

---

### 5.3.2: Interconverting keto- and enol- groups

5.3.2.a

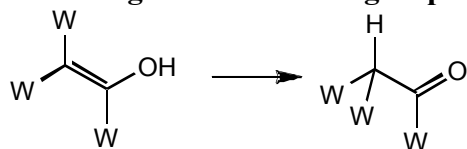

W can be anything, but the double bond must not be in an aromatic ring. This operator is spontaneous.

---

### 5.3.99: Intramolecular oxidoreductases

5.3.99.a

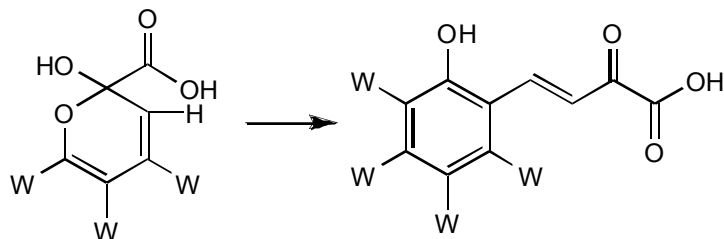

W can be any type of atom.

---

### 5.5.1: Intramolecular lyases

5.5.1.a

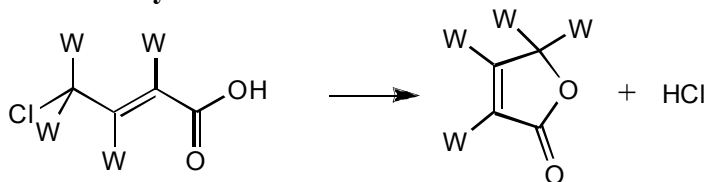

W can be any type of atom.

5.5.1.b

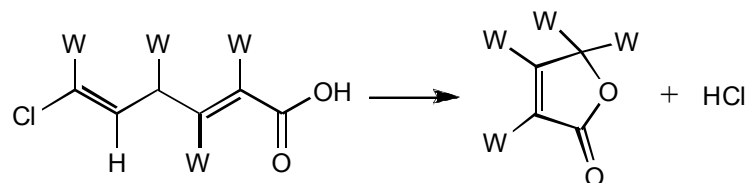

W can be any type of atom.

---

### 6.2.1: Acid-thiol ligases

6.2.1.a

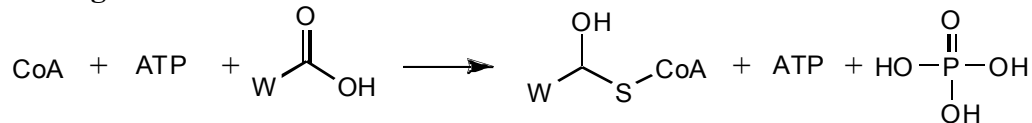

W can be any type of atom.

---
